# Supplementary material for: Efficient Genomic Interval Queries Using Augmented Range Trees
Source: PubMed Central journal article supplement (PMC6434014; doi:10.1038/s41598-019-41451-3), 2019-03-25
Supplement: 41598_2019_41451_MOESM1_ESM.pdf [file 41598_2019_41451_MOESM1_ESM.pdf]

## **Supplementary Information:**

# **Efficient Genomic Interval Queries Using Augmented Range Trees**

**Chengsheng Mao<sup>1</sup>, Alal Eran<sup>2,3</sup>, Yuan Luo<sup>1,\*</sup>**

<sup>1</sup>Department of Preventive Medicine, Feinberg School of Medicine, Northwestern University,  
Chicago, IL, USA;

<sup>2</sup>Department of Biomedical Informatics, Harvard Medical School, Boston, MA, USA;

<sup>3</sup>Department of Life Sciences, Ben Gurion University of the Negev, Israel;

\*Corresponding author: [yuan.luo@northwestern.edu](mailto:yuan.luo@northwestern.edu)

## S1. Test findOverlaps() code

```
library(IRanges)
print(R.Version())$version.string)
readAsRanges<-function(filename){
  cat(sprintf('reading file: %s\n',filename))
  itvs = read.table(filename)
  rg = IRanges(start=itvs$V1, end=itvs$V2)
  return(rg)
}

cat(paste('chromosome', 'any', 'within', 'start', 'end', 'equal'),
file="timeout_gr.txt", sep="\n", append=TRUE)
for (chr in c(1:22, 'X')) {
  datafile=sprintf('/home/shared_data/ENCODE/unqitv/chr%s.txt', chr)

queryfile=sprintf('/share/fsmresfiles/gnomad/gnomADr2.0.1/vcf/genomes
/genomes.r2.0.1.sites.21.csv', chr)
  gr1 = readAsRanges(datafile)
  gr1 = NCList(gr1)
  gr2 = readAsRanges(queryfile)
  gc()

  cat(sprintf('find any overlaps\n'))
  timestart<-Sys.time()
  findOverlaps(gr1, gr2, type='any')
  timeend<-Sys.time()
  t_any = as.double(timeend-timestart, units = "secs" )
  gc()

  cat(sprintf('find within overlaps\n'))
  timestart<-Sys.time()
  findOverlaps(gr1, gr2, type='within') # 4 relations: d, s, f, e
  timeend<-Sys.time()
  t_within = as.double(timeend-timestart, units = "secs" )
  gc()

  cat(sprintf('find start overlaps\n'))
  timestart<-Sys.time()
  findOverlaps(gr1, gr2, type='start') # 3 relations: s, si, e
  timeend<-Sys.time()
  t_start = as.double(timeend-timestart, units = "secs" )
  gc()

  cat(sprintf('find end overlaps\n'))
  timestart<-Sys.time()
  findOverlaps(gr1, gr2, type='end') # 3 relations: f, fi, e
```

```

timeend<-Sys.time()
t_end = as.double(timeend-timestart, units = "secs" )

cat(sprintf('find equal overlaps\n'))
timestart<-Sys.time()
findOverlaps(gr1, gr2,type='equal') # 1 relations: e
timeend<-Sys.time()
t_equal = as.double(timeend-timestart, units = "secs" )
gc()

cat(paste(chr, t_any,t_within,t_start,t_end,t_equal),
file="timeout_gr.txt",sep="\n",append=TRUE)
}

```

## S2. Interval counts in each chromosome

| Chromosome | ENCODE intervals | gnomAD intervals |
|------------|------------------|------------------|
| chr1       | 130,755,065      | 18,738,359       |
| chr2       | 109,795,844      | 20,204,527       |
| chr3       | 85,226,468       | 16,486,570       |
| chr4       | 62,323,066       | 16,097,457       |
| chr5       | 80,137,408       | 15,061,956       |
| chr6       | 88,374,652       | 14,016,946       |
| chr7       | 75,486,885       | 13,543,375       |
| chr8       | 61,585,063       | 12,963,423       |
| chr9       | 49,505,731       | 10,561,010       |
| chr10      | 63,396,858       | 11,139,488       |
| chr11      | 61,169,255       | 11,380,124       |
| chr12      | 66,165,580       | 10,975,733       |
| chr13      | 32,024,993       | 8,030,807        |
| chr14      | 40,938,091       | 7,574,648        |
| chr15      | 42,659,615       | 7,095,201        |
| chr16      | 46,250,642       | 7,847,535        |
| chr17      | 56,256,538       | 6,717,017        |
| chr18      | 28,192,149       | 6,353,949        |
| chr19      | 45,208,927       | 5,400,183        |
| chr20      | 37,954,390       | 5,063,026        |
| chr21      | 17,283,366       | 3,185,805        |
| chr22      | 22,644,544       | 3,245,659        |
| chrX       | 36,790,451       | 9,373,753        |
| total      | 1,340,125,581    | 241,056,551      |

**S3. The building time (in seconds) of the three tree structures on ENCODE genomic intervals for each chromosome.**

| <b>Chromosome</b> | <b>RTFC</b> | <b>2D-RT</b> | <b>IT</b>      |
|-------------------|-------------|--------------|----------------|
| chr1              | 749.23      | 1259.65      | <b>415.87</b>  |
| chr2              | 606.40      | 1039.65      | <b>400.09</b>  |
| chr3              | 456.99      | 680.08       | <b>303.82</b>  |
| chr4              | 315.89      | 541.14       | <b>168.16</b>  |
| chr5              | 426.93      | 710.28       | <b>246.75</b>  |
| chr6              | 480.34      | 825.22       | <b>267.85</b>  |
| chr7              | 401.38      | 580.27       | <b>221.49</b>  |
| chr8              | 315.30      | 544.01       | <b>173.46</b>  |
| chr9              | 249.58      | 417.13       | <b>135.34</b>  |
| chr10             | 328.04      | 554.97       | <b>174.88</b>  |
| chr11             | 314.78      | 532.39       | <b>173.40</b>  |
| chr12             | 345.88      | 585.10       | <b>194.14</b>  |
| chr13             | 147.71      | 249.00       | <b>77.88</b>   |
| chr14             | 199.04      | 336.07       | <b>107.22</b>  |
| chr15             | 211.76      | 351.60       | <b>113.49</b>  |
| chr16             | 231.40      | 379.06       | <b>127.23</b>  |
| chr17             | 294.13      | 484.06       | <b>145.69</b>  |
| chr18             | 131.49      | 218.94       | <b>63.52</b>   |
| chr19             | 229.74      | 371.54       | <b>120.93</b>  |
| chr20             | 187.66      | 314.78       | <b>99.71</b>   |
| chr21             | 75.40       | 126.74       | <b>37.68</b>   |
| chr22             | 105.05      | 173.46       | <b>50.64</b>   |
| chrX              | 167.48      | 294.04       | <b>85.03</b>   |
| total             | 6971.58     | 11569.15     | <b>3904.27</b> |

RTFC=range tree with fractional cascading; 2D-RT=basic 2-dimensional range tree; IT=interval tree.
